# Supplementary material
Source: HighWire-hosted journal article supplement (https://bmjopenquality.bmj.com/content/5/1/u208902.w3600)

# Process Map

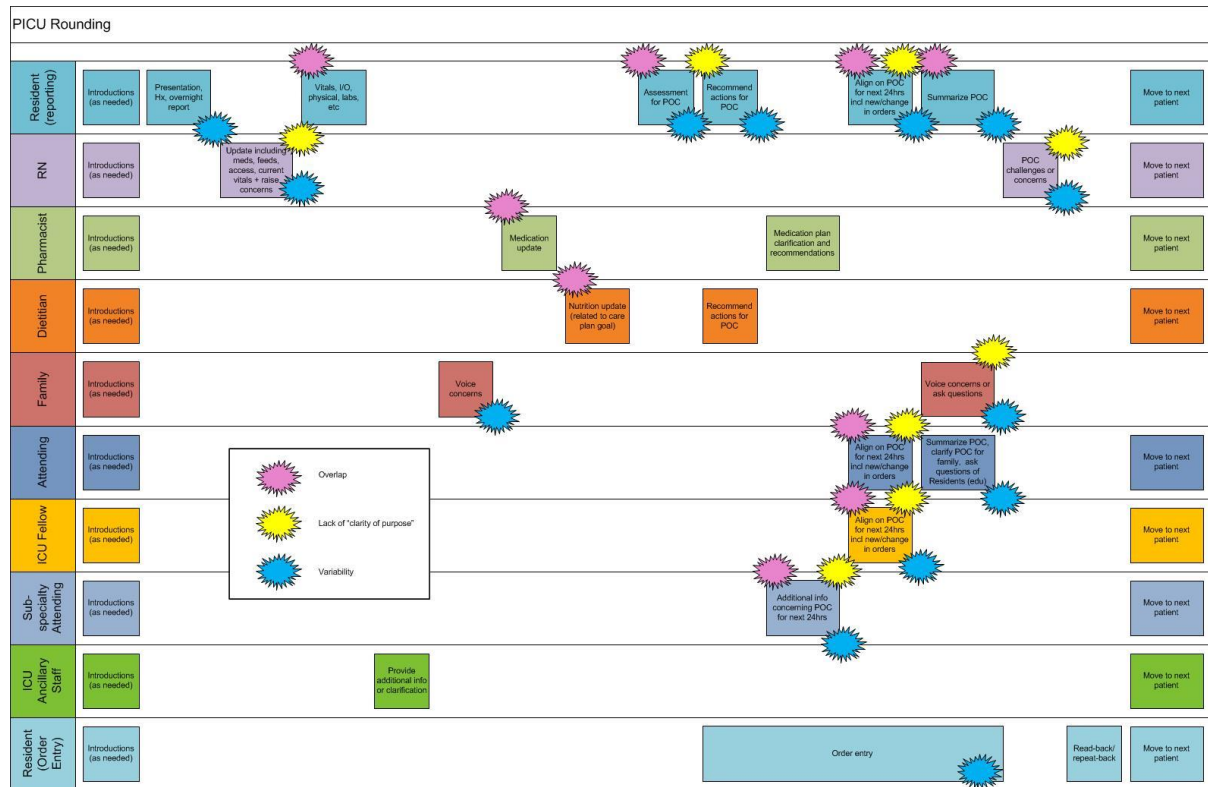

Supplement: inline-supplementary-material-1 [file inline-supplementary-material-1.pdf]
